# Supplementary material
Source: publisher site journal article supplement (http://content.karger.com/ProdukteDB/miscArchiv/000/209/280/Suppl_Tab1.pdf)
Supplement: Supplementary file 1 [file Suppl_Tab1.pdf]

**Table 1.** PankoMab, DF3 and VU-4-H5 staining in ductal breast carcinomas of 82 patients.

| Patient | Date of birth | T  | N     | G | LN met | ER  | PankoMab | DF3  | VU-4-H5 |
|---------|---------------|----|-------|---|--------|-----|----------|------|---------|
| 1       | 22.11.1938    | 1c | 0     | 1 | neg    | neg | 8        | 4    | 0       |
| 2       | 23.09.1938    | 1b | 0     | 1 | neg    | pos | 8        | 4    | 0       |
| 3       | 28.03.1926    | 1c | 0     | 1 | neg    | pos | 4        | 4    | 0       |
| 4       | 13.11.1951    | 1b | 0     | 1 | neg    | pos | 4        | 12   | 0       |
| 5       | 17.10.1934    | 1b | 0     | 1 | neg    | pos | 12       | 12   | 0       |
| 6       | 22.08.1935    | 1c | 0     | 1 | neg    | pos | 12       | 8    | 1       |
| 7       | 10.10.1940    | 1b | 0     | 1 | neg    | pos | 2        | 12   | 0       |
| 8       | 01.02.1926    | 1c | 0     | 1 | neg    | pos | 12       | 4    | 0       |
| 9       | 24.02.1940    | 1b | 0     | 1 | neg    | pos | 6        | 4    | 0       |
| 10      | 16.09.1937    | 1b | 0     | 2 | neg    | neg | 8        | 12   | 6       |
| 11      | 04.05.1947    | 1c | 0     | 2 | neg    | neg | 4        | 2    | 4       |
| 12      | 27.09.1932    | 1b | 0     | 2 | neg    | neg | 4        | 4    | 0       |
| 13      | 14.06.1951    | 2  | 0     | 2 | neg    | neg | 2        | 4    | 0       |
| 14      | 25.04.1914    | 1b | 0     | 2 | neg    | neg | 6        | 4    | 2       |
| 15      | 20.06.1934    | 2  | 0     | 2 | neg    | neg | 2        | 4    | 0       |
| 16      | 16.12.1921    | 1c | 0     | 2 | neg    | neg | 0        | 1    | 0       |
| 17      | 29.08.1940    | 1b | 0     | 2 | neg    | neg | 4        | 2    | 0       |
| 18      | 08.04.1930    | 1b | 0     | 2 | neg    | neg | 6        | 12   | 0       |
| 19      | 04.10.1934    | 1c | 0     | 2 | neg    | neg | 2        | 1    | 12      |
| 20      | 29.03.1933    | 1b | 0     | 2 | neg    | pos | 9        | 6    | 3       |
| 21      | 28.01.1943    | 1c | 0     | 2 | neg    | pos | 9        | 12   | 12      |
| 22      | 20.06.1945    | 1c | 0     | 2 | neg    | pos | 12       | 12   | 8       |
| 23      | 16.05.1943    | 1c | 0     | 2 | neg    | pos | 9        | 9    | 4       |
| 24      | 15.09.1922    | 1c | 0     | 2 | neg    | pos | 8        | 12   | 8       |
| 25      | 01.07.1925    | 1c | 0     | 2 | neg    | pos | 12       | 6    | 6       |
| 26      | 10.06.1918    | 1c | 0     | 2 | neg    | pos | 2        | 8    | 0       |
| 27      | 09.07.1921    | 2  | 0     | 2 | neg    | pos | 12       | 12   | 6       |
| 28      | 21.01.1939    | 1c | 0     | 2 | neg    | pos | 4        | 4    | 0       |
| 29      | 31.03.1914    | 1c | 0     | 2 | neg    | pos | 6        | 3    | 2       |
| 30      | 16.06.1937    | 1c | 0     | 3 | neg    | neg | 6        | 8    | 12      |
| 31      | 11.07.1941    | 1c | 0     | 3 | neg    | neg | 4        | 6    | 12      |
| 32      | 19.02.1931    | 1c | 0     | 3 | neg    | neg | 6        | 9    | 6       |
| 33      | 22.04.1951    | 2  | 0     | 3 | pos    | neg | 4        | 8    | 4       |
| 34      | 17.04.1924    | 1c | 0     | 3 | pos    | neg | 0        | 2    | 0       |
| 35      | 08.08.1929    | 1c | 0     | 3 | neg    | pos | 0        | 6    | 1       |
| 36      | 13.06.1943    | 1c | 0     | 3 | neg    | pos | 12       | 12   | 4       |
| 37      | 01.05.1950    | 1c | 0     | 3 | neg    | pos | 12       | 12   | 4       |
| 38      | 01.10.1950    | 2  | 0     | 3 | neg    | pos | 12       | 12   | 8       |
| 39      | 08.03.1935    | 1c | 0     | 3 | neg    | pos | 4        | 2    | 2       |
| 40      | 03.08.1940    | 1c | 0     | 3 | neg    | pos | 6        | 6    | 8       |
| 41      | 27.02.1943    | 1c | 0     | 3 | neg    | pos | 8        | 4    | 4       |
| 42      | 09.04.1920    | 1c | 0     | 3 | neg    | pos | 4        | 12   | 12      |
| 43      | 24.11.1938    | 1c | 0     | 3 | neg    | pos | 9        | 12   | 4       |
| 44      | 24.03.1941    | 1c | 0     | 3 | neg    | pos | 6        | 3    | 12      |
| 45      | 14.05.1931    | 1b | 1biii | 2 | pos    | neg | 6        | 12   | 8       |
| 46      | 23.12.1950    | 2  | 1a    | 2 | pos    | neg | 8        | 8    | 12      |
| 47      | 28.01.1927    | 1c | 2     | 2 | pos    | neg | 12       | 12   | 8       |
| 48      | 01.11.1936    | 1c | 1biii | 2 | pos    | neg | 9        | 12   | 8       |
| 49      | 02.08.1918    | 4b | 2     | 2 | pos    | neg | 1        | 4    | 9       |
| 50      | 25.09.1941    | 1c | 1biii | 2 | pos    | neg | 4        | n.a. | 12      |
| 51      | 31.03.1941    | 1c | 2     | 2 | pos    | neg | 4        | 12   | 12      |
| 52      | 25.10.1937    | 1b | 1bi   | 2 | pos    | neg | 12       | 12   | n.a.    |
| 53      | 25.12.1940    | 1c | 1bi   | 2 | pos    | neg | 9        | 12   | 12      |
| 54      | 07.10.1917    | 1c | 2     | 2 | pos    | neg | 4        | 12   | 8       |
| 55      | 22.08.1941    | 2  | 2     | 2 | pos    | pos | 8        | 8    | 12      |
| 56      | 20.03.1932    | 4  | 1biv  | 2 | pos    | pos | 9        | 2    | 1       |
| 57      | 21.07.1922    | 1c | 2     | 2 | pos    | pos | 6        | 12   | 8       |
| 58      | 14.06.1935    | 1b | 1biii | 2 | pos    | pos | 12       | 12   | 8       |
| 59      | 06.01.1932    | 2  | 1biii | 2 | pos    | pos | 12       | 6    | 12      |
| 60      | 16.07.1935    | 1c | 1biii | 2 | pos    | pos | 9        | 12   | 12      |
| 61      | 23.08.1935    | 2  | 1biii | 2 | pos    | pos | 4        | 12   | 3       |
| 62      | 11.05.1926    | 4  | 1biii | 2 | pos    | pos | 9        | 4    | 4       |
| 63      | 21.02.1926    | 4b | 2     | 2 | pos    | pos | 6        | 12   | 6       |
| 64      | 13.07.1941    | 1c | 1biii | 2 | pos    | pos | 8        | 6    | n.a.    |
| 65      | 15.03.1926    | 2  | 2     | 3 | pos    | neg | 12       | 12   | 2       |
| 66      | 04.03.1967    | 1c | 1biii | 3 | pos    | neg | 2        | 2    | 12      |
| 67      | 15.03.2026    | 2  | 1biv  | 3 | pos    | neg | 12       | 2    | 0       |
| 68      | 23.10.1919    | 2  | 1biv  | 3 | pos    | neg | 0        | 0    | 12      |
| 69      | 26.10.1934    | 2  | 2     | 3 | pos    | neg | 6        | 9    | 0       |
| 70      | 31.01.1939    | 1c | 1biv  | 3 | pos    | neg | 6        | 12   | 12      |
| 71      | 14.01.1942    | 2  | 1biii | 3 | pos    | neg | 8        | 8    | 12      |

| Patient | Date of birth | T  | N     | G | LN met | ER  | PankoMab | DF3 | VU-4-H5 |
|---------|---------------|----|-------|---|--------|-----|----------|-----|---------|
| 72      | 18.05.1945    | 4d | 2     | 3 | pos    | neg | 6        | 4   | 8       |
| 73      | 17.06.1947    | 1a | 1biii | 3 | pos    | pos | 4        | 6   | 12      |
| 74      | 17.02.1944    | 1c | 1biv  | 3 | pos    | pos | 9        | 6   | 12      |
| 75      | 17.11.1937    | 2  | 2     | 3 | pos    | pos | 12       | 9   | n.a.    |
| 76      | 13.07.1943    | 1c | 1bi   | 3 | pos    | pos | 9        | 9   | 0       |
| 77      | 11.02.1938    | 2  | 1biv  | 3 | pos    | pos | 4        | 2   | 1       |
| 78      | 29.06.1939    | 1b | 2     | 3 | pos    | pos | 4        | 0   | 12      |
| 79      | 26.11.1916    | 1c | 1a    | 3 | pos    | pos | 8        | 8   | 6       |
| 80      | 06.09.1937    | 2  | 1bii  | 3 | pos    | pos | 8        | 4   | 12      |
| 81      | 26.09.1925    | 1c | 1bi   | 3 | pos    | pos | 6        | 3   | 12      |
| 82      | 23.11.1921    | 1c | 1biii | 3 | pos    | pos | 5        | 9   | 6       |

n.a., Not analyzable; LN met, lymph node metastasis.
